# Supplementary material for: Mesogenic versus non-mesogenic azo dye confined in a soft-matter template for realization of optically switchable diffraction gratings
Source: Royal Society of Chemistry journal article supplement (doi:10.1039/c1jm10284b), 2011-01-01
Supplement: c1jm10284b.pdf [file c1jm10284b.pdf]

## Supplementary Information

### a) Comparison under similar experimental conditions:

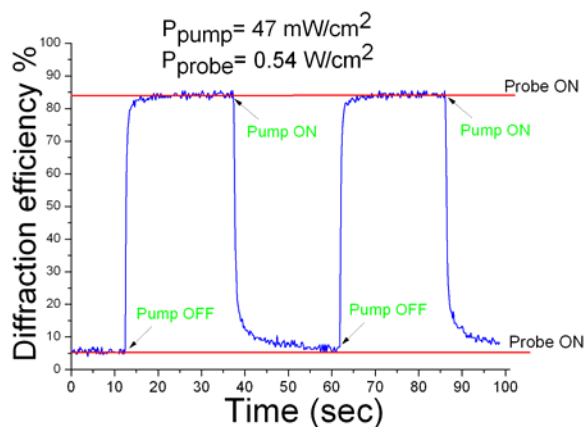

Supplementary information 1: reversible and repeatable changes of the diffraction efficiency of the CPND based sample

### b) Influence of dyes on nematic range and order parameter.

To further confirm the interesting properties of CPND-57, we measured the temperature range of nematic phase of the NLC doped both with MR and CPND. To this end, we measured, for both samples, the intensity transmitted (at  $\lambda=633 \text{ nm}$ ) between crossed polarizers while varying the temperature; results are reported in the supplementary information 2. Spectra show that, while

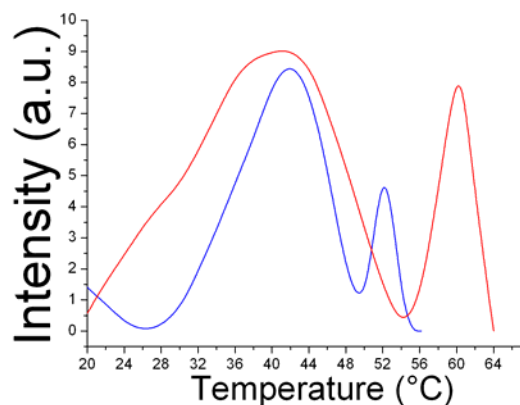

Supplementary information 2: Transmitted intensity versus the temperature for the NLC doped with MR (blue curve) and CPND (red curve)

the Nematic to Isotropic ( $N \rightarrow I$ ) transition temperature of the pure NLC (E7, provided by Merck) is 60 °C, in the case of NLC doped with MR (blue curve) the transition value is reduced to 56 °C and, on the contrary, for the NLC doped with CPND, the value is increased to 64 °C. These results point out that the mesogenic azo dyes (CPND) do not affect, but even improve, the nematic range. Indeed, we have measured the birefringence ( $\Delta n$ ) of both samples at room temperature and results show that in the case of NLC doped with CPND  $\Delta n$  is 0.214 while in the case of NLC doped with MR  $\Delta n$  is reduced to 0.182.
